# Supplementary material
Source: ML conference proceedings conference paper supplement (https://proceedings.mlr.press/v124/viinikka20a.html)
Supplement: Supplementary file [file viinikka20a-supp.pdf]

---

# Layering-MCMC for Structure Learning in Bayesian Networks

## Supplement

---

**Jussi Viinikka**

Department of Computer Science  
University of Helsinki  
jussi.viinikka@helsinki.fi

**Mikko Koivisto**

Department of Computer Science  
University of Helsinki  
mikko.koivisto@helsinki.fi

### A PROOF OF LEMMA 1

We prove that  $g_0(\emptyset, \emptyset) = \pi(B)$ . Recall that here  $B = B_1 B_2 \cdots B_\ell$  is a fixed  $M$ -layering.

Let  $T \subseteq D \subseteq B_j$  and  $U = B_{1:j-1} \cup D$ . We show that

$$g_j(U, T) = \sum_R \prod_{i=2}^k f(U \cup R_{1:i-1}, R_{i-1}, R_i), \quad (1)$$

where  $R = R_1 R_2 \cdots R_k$  runs through all ordered partitions of  $T \cup (V \setminus U)$  such that  $R_1 = T$  and that  $R$  is compatible with the layering  $B$ . Then the claim follows by Equation (2) of the main paper.

We proceed by induction on  $|U|$ . If  $|U| = n$ , then  $D = B_k$ , and by definition,  $g_k(U, T) = 1$ . This equals (1) as the sum has a single term ( $R = R_1 = T$ ) and the empty product evaluates to 1.

Suppose then that  $|U| < n$  and that the claim holds for all larger sets. We branch into two cases.

**Case  $D = B_j$  with  $j < \ell$ .** Now, if  $|B_{j+1}| > M$ , then by definition and the induction hypothesis,  $g_j(U, T)$  equals

$$f(U, T, B_{j+1}) \sum_R \prod_{i=2}^k f(B_{1:j+1} \cup R_{1:i-1}, R_{i-1}, R_i),$$

where  $R = R_1 R_2 \cdots R_k$  runs through all ordered partitions of  $B_{j+1} \cup (V \setminus B_{1:j+1})$  such that  $R_1 = B_{j+1}$  and that  $R$  is compatible with  $B$ . By writing  $R'_2 := B_{j+1}$  and renaming  $R'_{i+1} := R_i$  for  $i \geq 2$ , we get that  $g_j(U, T)$  equals

$$\sum_{R'} \prod_{i=2}^k f(U \cup R'_{1:i-1}, R'_{i-1}, R'_i),$$

where  $R' = R'_1 R'_2 \cdots R'_k$  runs through all ordered partitions of  $T \cup (V \setminus U)$  such that  $R'_1 = T$  and that  $R'$

is compatible with the layering  $B$  (since we must have  $R'_2 = B_{j+1}$ ).

Otherwise,  $|B_{j+1}| \leq M$  and by definition and the induction hypothesis,  $g_j(U, T)$  equals

$$\begin{aligned} & \sum_{\substack{\emptyset \subset S \subseteq B_{j+1} \\ j=0 \text{ or } |S| > M - |B_j|}} f(U, T, S) \\ & \times \sum_R \prod_{i=2}^k f(U \cup S \cup R_{1:i-1}, R_{i-1}, R_i), \end{aligned}$$

where  $R = R_1 R_2 \cdots R_k$  runs through all ordered partitions of  $S \cup (V \setminus (U \cup S))$  such that  $R_1 = S$  and that  $R$  is compatible with the layering  $B$ . By renaming  $R'_2 := S$  and  $R'_{i+1} := R_i$  for  $i \geq 2$ , we get that  $g_j(U, T)$  equals

$$\sum_{R'} \prod_{i=2}^k f(U \cup R'_{1:i-1}, R'_{i-1}, R'_i),$$

where  $R' = R'_1 R'_2 \cdots R'_k$  runs through all ordered partitions of  $T \cup (V \setminus U)$  such that  $R'_1 = T$  and that  $R'$  is compatible with the layering  $B$ : indeed, if  $j = 0$ , there is no constraint on the size of the first part  $R'_2$  in layer  $B_{j+1}$ , whereas if  $j > 0$ , it follows from the properties of  $M$ -layerings that  $R'_2$  must not fit the previous layer, i.e.,  $|R'_2| > M - |B_j|$ .

**Case  $D \subset B_j$  with  $j \leq \ell$ .** By definition and the induction hypothesis,  $g_j(U, T)$  equals

$$\begin{aligned} & \sum_{\emptyset \subset S \subseteq B_j \setminus U} f(U, T, S) \\ & \times \sum_R \prod_{i=2}^k f(U \cup S \cup R_{1:i-1}, R_{i-1}, R_i), \end{aligned}$$

where  $R = R_1 R_2 \cdots R_k$  runs through all ordered partitions of  $S \cup (V \setminus (U \cup S))$  such that  $R_1 = S$  and that  $R$  is compatible with the layering  $B$ . By renaming  $R'_2 := S$

and  $R'_{i+1} := R_i$  for  $i \geq 2$ , we get that  $g_j(U, T)$  equals

$$\sum_{R'} \prod_{i=2} f(U \cup R'_{1:i-1}, R'_{i-1}, R'_i),$$

where  $R' = R'_1 R'_2 \dots R'_k$  runs through all ordered partitions of  $T \cup (V \setminus U)$  such that  $R'_1 = T$  and that  $R'$  is compatible with the layering  $B$ : indeed, since  $D \subset B_j$ , any nonempty  $R'_2 \subseteq B_j \setminus D$  is a valid part in an  $M$ -layering, for  $R'_2$  is not the first part in  $B_j$ .

This completes the proof of Lemma 1.

## B GENERATING A ROOT-PARTITION

Given an  $M$ -layering  $B$ , we can generate a partition  $R \in \mathcal{R}(B)$  with probability proportional to  $\pi(R)$  by

```

GENERATE-PARTITION( $B_1 B_2 \dots B_\ell$ )
  // We assume the arrays  $\hat{\tau}_j$  and  $g_j$  are available
  1  $j = 0; D = \emptyset; T = \emptyset$ 
  2  $k = 0;$ 
  3 while  $j \leq \ell$ 
  4   if  $D == B_j$                                      //  $j'$  and  $D'$ 
  5      $j' = j + 1; D' = \emptyset$ 
  6   else  $j' = j; D' = D$ 

  7   if  $D \subset B_j$  or  $j == \ell$  or  $|B_{j+1}| \leq M$       //  $S$  and  $A$ 
  8      $S = \{S \subseteq B_{j'} \setminus D' : \emptyset \subset S\}; A = \emptyset$ 
  9   else  $S = \{B_{j+1}\}; A = B_{j+1} \setminus \min B_{j+1}$ 

 10  for each  $v \in B_{j'} \setminus D'$                           // Construct  $p[\cdot]$ 
 11    if  $T == \emptyset$ 
 12       $p[v] = \pi_v(\emptyset)$ 
 13    else if  $T == B_j$                                   // Special case
 14       $p[v] = \hat{\tau}_v[\{v\}]$ 
 15    else  $p[v] = \hat{\tau}_v[D] - \hat{\tau}_v[D \setminus T]$ 

 16   $f[A] = 1$                                            // Construct  $f[A]$ 
 17  for each  $v \in A$ 
 18    multiply  $f[A]$  by  $p[v]$ 

 19  draw  $r$  from  $\text{Unif}(0, g_j[D, T])$ 
 20   $s = 0$ 
 21  for each  $S \in \mathcal{S}$  in increasing order by  $|S|$ 
 22     $v = \min S$ 
 23     $f[S] = f[S \setminus \{v\}] \cdot p[v]$ 
 24    if  $D \neq B_j$  or  $j == 0$  or  $|S| > M - |B_j|$ 
 25      add  $f[S] \cdot g_{j'}[D' \cup S, S]$  to  $s$ 
 26    if  $s > r$                                            // The next partition element is  $S$ 
 27       $k = k + 1; R_k = S; T = S; D = D' \cup S$ 
 28    break
 29   $j = j'$ 
 30 return  $R_1 R_2 \dots R_k$ 

```

Figure B.1: Pseudo code for generating a random partition  $R$  from the conditional posterior  $\pi(R|B)$  given an  $M$ -layering  $B$ . Note:  $B_0 = B_{\ell+1} = \emptyset$ .

stochastic backtracking of the dynamic programming algorithm that computes  $\pi(B)$ . The pseudo code given in Figure B.1 gives one way to organize the computations.

## C EXPERIMENTS FOR LYMPH AND HEPATITIS DATASET

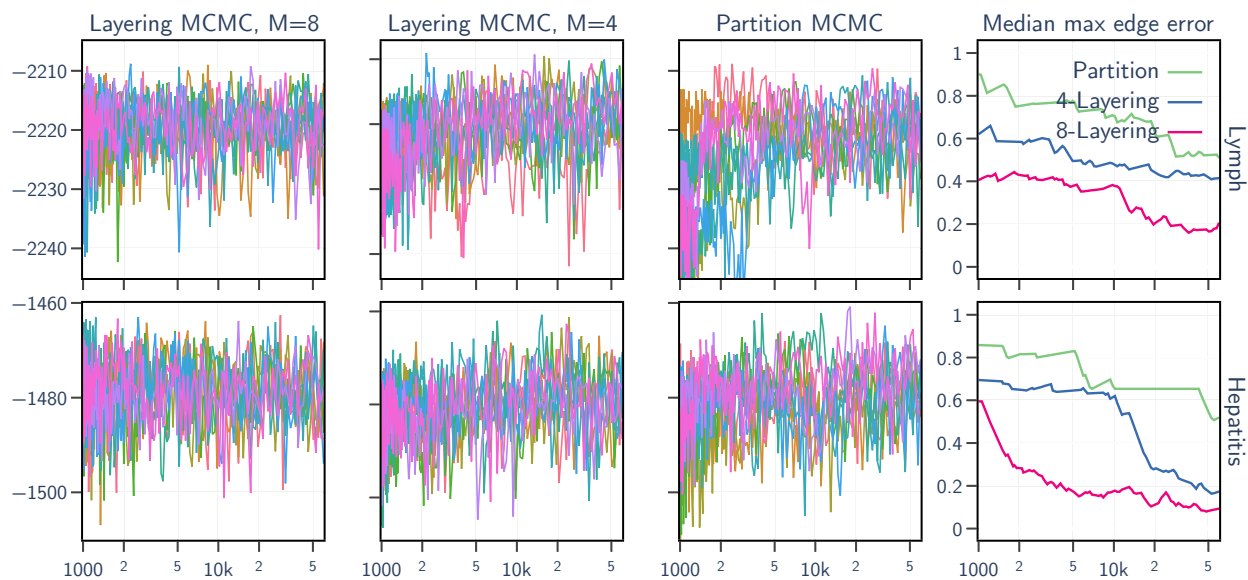

Figure C.1: Comparison of layering-MCMC and partition-MCMC on benchmark data sets. *Left:* The posterior probability of the sampled DAG (a logarithm of the unnormalized posterior) per simulation step, in nine independent runs. *Right:* The largest absolute error in the arc posterior probability estimate as a function of the length of the simulation (median over nine independent runs). Note that the  $x$ -axis is logarithmic and that, per run, shown are only 200 evenly spaced points out of the 60 000 steps.
